# Supplementary material for: Advances in Applying Computer-Aided Drug Design for Neurodegenerative Diseases
Source: MDPI journal article supplement (doi:10.3390/ijms22094688), 2021-04-28
Supplement: s1 [file s1]

**Supplementary Table S1:** A list of 211 pieces of software for CADD. Software was ranked according to the equation  $S_i = \log(10^6 \cdot C_i / C_{\text{total}})$  where  $S_i$  is the score for tool  $i$ ,  $C_i$  is the number of citations to tool  $i$ , and  $C_{\text{total}}$  is the number of citations to all tools considered. Number of citations was obtained using Google Scholar, last accessed on 14<sup>th</sup> April 2021.

| No. | Software                                                                                                   | No. of citations to published studies | Score  | Features                                                                                                       | Accessibility | Website                                                                                                                                                 |
|-----|------------------------------------------------------------------------------------------------------------|---------------------------------------|--------|----------------------------------------------------------------------------------------------------------------|---------------|---------------------------------------------------------------------------------------------------------------------------------------------------------|
| 1   | HADDOCK                                                                                                    | 26490                                 | 4.7323 | Docks protein–protein based on biochemical or biophysical information                                          | Free          | <a href="https://wenmr.science.uu.nl/haddock2.4/">https://wenmr.science.uu.nl/haddock2.4/</a>                                                           |
| 2   | AutoDock Autodock 1 Autodock 2.4 Autodock 3 Autodock 4 Autodock 4.2 Autodock Vina AutoDockFR AutoDockTools | 22422                                 | 4.6599 | Automated docking tools                                                                                        | Free          | <a href="http://autodock.scripps.edu/">http://autodock.scripps.edu/</a>                                                                                 |
| 3   | Glide Glide 1.8 Glide 2 Glide 2.5                                                                          | 22091                                 | 4.6535 | Rapid, Accurate Docking and Scoring approach                                                                   | Subscription  | <a href="https://www.schrodinger.com/glide">https://www.schrodinger.com/glide</a>                                                                       |
| 4   | FlexX                                                                                                      | 19987                                 | 4.6100 | Predicts the geometry of the protein–ligand complex and estimates the binding affinity                         | Free          | <a href="https://www.biosolveit.de/FlexX/">https://www.biosolveit.de/FlexX/</a>                                                                         |
| 5   | LigandFit                                                                                                  | 19890                                 | 4.6079 | Presents a shape-based approach for docking ligands into the active site of the protein                        | Subscription  | <a href="https://www.phenix-online.org/documentation/reference/ligandfit.html">https://www.phenix-online.org/documentation/reference/ligandfit.html</a> |
| 6   | AmberTools                                                                                                 | 14572                                 | 4.4728 | A suite of biomolecular simulation programs                                                                    | Subscription  | <a href="https://ambermd.org/">https://ambermd.org/</a>                                                                                                 |
| 7   | ENCoM                                                                                                      | 13145                                 | 4.4280 | A coarse-grained normal mode analysis method utilized for different residues in proteins or nucleotides in RNA | Free          | <a href="http://biophys.umontreal.ca/nrg/resources.html">http://biophys.umontreal.ca/nrg/resources.html</a>                                             |
| 8   | PROCHECK-NMR                                                                                               | 10783                                 | 4.3420 | Checks the stereochemical quality of a protein structure solved by NMR                                         | Free          | <a href="https://www.ebi.ac.uk/thornton-srv/software/PROCHECK/">https://www.ebi.ac.uk/thornton-srv/software/PROCHECK/</a>                               |

| No. | Software                                                                                                                                     | No. of citations to published studies | Score  | Features                                                                                       | Accessibility | Website                                                                                                                                                                             |
|-----|----------------------------------------------------------------------------------------------------------------------------------------------|---------------------------------------|--------|------------------------------------------------------------------------------------------------|---------------|-------------------------------------------------------------------------------------------------------------------------------------------------------------------------------------|
| 9   | MCDOCK                                                                                                                                       | 10603                                 | 4.3347 | Allows for a full flexibility of ligands in the docking calculations                           | Free          | DOI: 10.1021/jm990129n                                                                                                                                                              |
| 10  | ICM ICM 2.8 ICM-Dock                                                                                                                         | 10271                                 | 4.3209 | A new method for protein modelling and design applications to docking and structure prediction | Subscription  | <a href="http://www.molsoft.com/docking.html">http://www.molsoft.com/docking.html</a>                                                                                               |
| 11  | Dock Dock2 Dock3 Dock4 Dock5 Dock6 Dock7 Dock8 Dock9                                                                                         | 8181                                  | 4.2221 | Based on Geometric Matching Algorithm                                                          | Free          | <a href="http://dock.compbio.ucsf.edu/">http://dock.compbio.ucsf.edu/</a>                                                                                                           |
| 12  | SOFT Docking                                                                                                                                 | 7474                                  | 4.1828 | Predicts the sites of interaction between two cognate molecules based on their 3D structures   | Subscription  | <a href="https://doi.org/10.1016/0022-2836(91)90859-5">https://doi.org/10.1016/0022-2836(91)90859-5</a>                                                                             |
| 13  | FDS                                                                                                                                          | 7188                                  | 4.1659 | Cluster analysis based on distance similarities                                                | Free          | <a href="http://www.scfbio-iitd.res.in/dock/fds.jsp">http://www.scfbio-iitd.res.in/dock/fds.jsp</a>                                                                                 |
| 14  | DockVision                                                                                                                                   | 6950                                  | 4.1512 | Increases capability to generate laudable results                                              | Free          | <a href="http://dockvision.sness.net/overview/overview.html">http://dockvision.sness.net/overview/overview.html</a>                                                                 |
| 15  | PRODOCK                                                                                                                                      | 6442                                  | 4.1183 | Renders the programming easier and the definition of molecular flexibility straighter forward  | Subscription  | <a href="https://doi.org/10.1002/(SICI)1096-987X(199903)20:4&lt;412::AID-JCC3&gt;3.0.CO;2-N">https://doi.org/10.1002/(SICI)1096-987X(199903)20:4&lt;412::AID-JCC3&gt;3.0.CO;2-N</a> |
| 16  | YASARA YASARA Dynamics YASARA Model YASARA NMR Module YASARA Structure YASARA View YASARA Virtual Reality Workstation YASARA/WHAT IF Twinset | 5870                                  | 4.0779 | A molecular-graphics, -modeling and -simulation program                                        | Free          | <a href="http://www.yasara.org/products.htm">http://www.yasara.org/products.htm</a>                                                                                                 |
| 17  | KBDOCK                                                                                                                                       | 5820                                  | 4.0742 | A program that proposes structural templates for protein docking                               | Free          | <a href="http://kbdock.loria.fr/">http://kbdock.loria.fr/</a>                                                                                                                       |

| No. | Software                                                           | No. of citations to published studies | Score  | Features                                                                                                     | Accessibility | Website                                                                                                                   |
|-----|--------------------------------------------------------------------|---------------------------------------|--------|--------------------------------------------------------------------------------------------------------------|---------------|---------------------------------------------------------------------------------------------------------------------------|
| 18  | TreeDock                                                           | 5796                                  | 4.0724 | A docking tool that is able explore all clash-free orientations at very fine resolution in a reasonable time | Subscription  | <a href="https://doi.org/10.1021/ja011240x">https://doi.org/10.1021/ja011240x</a>                                         |
| 19  | LePro                                                              | 5639                                  | 4.0605 | Generates docking input file for LeDock with refined protein atoms within 0.4 nm of any atom of the ligand   | Free          | <a href="http://www.lephar.com/download.htm">http://www.lephar.com/download.htm</a>                                       |
| 20  | DockoMatic                                                         | 5594                                  | 4.0570 | A software that docks secondary ligands used to assist inverse virtual screening                             | Free          | <a href="https://doi.org/10.1186/1756-0500-3-289">https://doi.org/10.1186/1756-0500-3-289</a>                             |
| 21  | SYBYL_ChemScore<br>SYBYL_D-Score<br>SYBYL_F-Score<br>SYBYL_G-Score | 5486                                  | 4.0485 | A conformational sampling and scoring function                                                               | Subscription  | <a href="https://doi.org/10.1021/jm0203783">https://doi.org/10.1021/jm0203783</a>                                         |
| 22  | ZDOCK ZDOCKpro                                                     | 5415                                  | 4.0429 | A new scoring function for the initial stage of unbound docking                                              | Subscription  | <a href="http://zdock.umassmed.edu/">http://zdock.umassmed.edu/</a>                                                       |
| 23  | AADS                                                               | 5087                                  | 4.0157 | An automated active site identification, docking, and scoring protocol                                       | Free          | <a href="http://www.scfbio-iitd.res.in/dock/ActiveSite_new.jsp">http://www.scfbio-iitd.res.in/dock/ActiveSite_new.jsp</a> |
| 24  | Surflex Dock                                                       | 4896                                  | 3.9991 | An automatic and flexible molecular docking algorithm for rapid in-silico drug-screening applications        | Subscription  | <a href="https://doi.org/10.1007/s10822-007-9114-2">https://doi.org/10.1007/s10822-007-9114-2</a>                         |
| 25  | PyMOL PyMOL<br>1.4.1 PyMOL 2.1.1<br>PyMOL 2.4                      | 4805                                  | 3.9910 | An open-source, user-sponsored, molecular visualization system                                               | Subscription  | <a href="http://www.pymol.org">http://www.pymol.org</a>                                                                   |
| 26  | FlipDock                                                           | 4614                                  | 3.9733 | Allows the automated docking of flexible ligand molecules into active sites of flexible receptor molecules   | Free          | <a href="http://flipdock.scripps.edu/">http://flipdock.scripps.edu/</a>                                                   |
| 27  | SymmDock                                                           | 4545                                  | 3.9668 | A Flexible Induced-fit Backbone Refinement in Molecular Docking                                              | Free          | <a href="http://bioinfo3d.cs.tau.ac.il/FiberDock/php.php">http://bioinfo3d.cs.tau.ac.il/FiberDock/php.php</a>             |
| 28  | ClusPro                                                            | 4360                                  | 3.9487 | A widely used tool for protein-protein docking                                                               | Free          | <a href="http://nrc.bu.edu/cluster">http://nrc.bu.edu/cluster</a>                                                         |

| No. | Software    | No. of citations to published studies | Score  | Features                                                                                                                                                                        | Accessibility | Website                                                                                                                                                                       |
|-----|-------------|---------------------------------------|--------|---------------------------------------------------------------------------------------------------------------------------------------------------------------------------------|---------------|-------------------------------------------------------------------------------------------------------------------------------------------------------------------------------|
| 29  | Surflex     | 4180                                  | 3.9304 | A robust screening tool                                                                                                                                                         | Subscription  | <a href="https://pubmed.ncbi.nlm.nih.gov/12570372/">https://pubmed.ncbi.nlm.nih.gov/12570372/</a>                                                                             |
| 30  | ConsDock    | 4001                                  | 3.9114 | A pose within 2 Å RMSD of the X-ray structure can be performed with this software                                                                                               | Subscription  | <a href="https://doi.org/10.1002/prot.10119">https://doi.org/10.1002/prot.10119</a>                                                                                           |
| 31  | EADock      | 3961                                  | 3.9071 | A software that is based on "evolutionary algorithms" that generates the good solution through sampling and recognizes this solution as the correct one by its scoring function | Free          | <a href="http://www.swissdock.ch/">http://www.swissdock.ch/</a>                                                                                                               |
| 32  | Fred        | 3953                                  | 3.9062 | A program that docks 70 % of the structures within 2 Å in the cognate docking test                                                                                              | Subscription  | <a href="https://www.eyesopen.com/oedocking-tk">https://www.eyesopen.com/oedocking-tk</a>                                                                                     |
| 33  | PASS        | 3907                                  | 3.9011 | A prediction of Activity Spectra for Substances                                                                                                                                 | Free          | <a href="http://www.way2drug.com/passonline/">http://www.way2drug.com/passonline/</a>                                                                                         |
| 34  | PhDock      | 3890                                  | 3.8992 | A determination of target-based theoretical pharmacophore                                                                                                                       | Free          | <a href="http://iscreen.cmu.edu.tw/phdock.php">http://iscreen.cmu.edu.tw/phdock.php</a>                                                                                       |
| 35  | Robetta     | 3545                                  | 3.8589 | A protein structure prediction service that is continually evaluated through Continuous Automated Model evaluation (CAMEO)                                                      | Subscription  | <a href="http://robetta.bakerlab.org/">http://robetta.bakerlab.org/</a>                                                                                                       |
| 36  | InterEvDock | 3461                                  | 3.8485 | An expanded server for protein docking using evolutionary and biological information from homology models and multimeric inputs                                                 | Free          | <a href="https://mobyli.rpbs.univ-paris-diderot.fr/cgi-bin/portal.py#forms::InterEvDock2">https://mobyli.rpbs.univ-paris-diderot.fr/cgi-bin/portal.py#forms::InterEvDock2</a> |
| 37  | FlexDock    | 3433                                  | 3.8449 | An algorithm for Automatic prediction of protein interactions with large scale motion                                                                                           | Subscription  | <a href="http://bioinfo3d.cs.tau.ac.il/">http://bioinfo3d.cs.tau.ac.il/</a>                                                                                                   |
| 38  | RiboDock    | 3316                                  | 3.8299 | A virtual-screening system for automated flexible docking.                                                                                                                      | Free          | <a href="https://doi.org/10.1023/B:JCAM.0000035199.48747.1e">https://doi.org/10.1023/B:JCAM.0000035199.48747.1e</a>                                                           |
| 39  | GASP        | 3271                                  | 3.8239 | A "Genetic Algorithm Similarity Program" used for testing and investigating methods in statistical genetics by generating samples of                                            | Subscription  | <a href="https://doi.org/10.1023/A:1008844323931">https://doi.org/10.1023/A:1008844323931</a>                                                                                 |

| No. | Software     | No. of citations to published studies | Score  | Features                                                                                                                             | Accessibility | Website                                                                                                                                       |
|-----|--------------|---------------------------------------|--------|--------------------------------------------------------------------------------------------------------------------------------------|---------------|-----------------------------------------------------------------------------------------------------------------------------------------------|
|     |              |                                       |        | family data based on user specified models                                                                                           |               |                                                                                                                                               |
| 40  | GOLD         | 3208                                  | 3.8155 | A protein ligand docking software that enables you to make confident binding mode predictions, and achieve high database enrichments | Subscription  | <a href="https://doi.org/10.1002/prot.10465">https://doi.org/10.1002/prot.10465</a>                                                           |
| 41  | FTDOCK       | 3205                                  | 3.8151 | A tool that performs a global scan of translational and rotational space                                                             | Free          | <a href="http://www.sbg.bio.ic.ac.uk/docking/download.html">http://www.sbg.bio.ic.ac.uk/docking/download.html</a>                             |
| 42  | QXP          | 3186                                  | 3.8125 | A quick explore (QXP) search algorithm                                                                                               | Subscription  | <a href="https://doi.org/10.1023/A:1007907728892">https://doi.org/10.1023/A:1007907728892</a>                                                 |
| 43  | GlamDock     | 3150                                  | 3.8076 | A mapping-based description of the rigid body translation and rotation                                                               | Subscription  | <a href="http://www.chil2.de/Glamdock.html">http://www.chil2.de/Glamdock.html</a>                                                             |
| 44  | PSO@AUTODOCK | 3113                                  | 3.8024 | A Fast and efficient protein ligand docking program based on swarm optimization                                                      | Subscription  | <a href="https://doi.org/10.1111/j.1747-0285.2007.00588.x">https://doi.org/10.1111/j.1747-0285.2007.00588.x</a>                               |
| 45  | SKE-DOCK     | 3077                                  | 3.7974 | A simple geometry docking and a knowledge base scoring function                                                                      | Subscription  | <a href="http://www.pharm.kitasato-u.ac.jp/bmd/files/SKE_DOCK.html">http://www.pharm.kitasato-u.ac.jp/bmd/files/SKE_DOCK.html</a>             |
| 46  | Q-Dock(LHM)  | 3069                                  | 3.7963 | A reduced representation mod description                                                                                             | Subscription  | DOI: 10.1002/jcc.21395                                                                                                                        |
| 47  | PatchDock    | 2931                                  | 3.7763 | An object recognition and image segmentation techniques used in computer vision                                                      | Subscription  | <a href="http://bioinfo3d.cs.tau.ac.il/wk/index.php/Servers_%26_Software">http://bioinfo3d.cs.tau.ac.il/wk/index.php/Servers_%26_Software</a> |
| 48  | MS-DOCK      | 2804                                  | 3.7570 | All multiple conformations are rigidly docked                                                                                        | Subscription  | <a href="https://doi.org/10.1186/1471-2105-9-184">https://doi.org/10.1186/1471-2105-9-184</a>                                                 |
| 49  | PSI-DOCK     | 2638                                  | 3.7305 | A docking method, Pose-Sensitive Inclined (PSI)-DOCK, for flexible ligand docking                                                    | Subscription  | <a href="https://doi.org/10.1002/prot.20790">https://doi.org/10.1002/prot.20790</a>                                                           |

| No. | Software     | No. of citations to published studies | Score  | Features                                                                                                           | Accessibility | Website                                                                                                                   |
|-----|--------------|---------------------------------------|--------|--------------------------------------------------------------------------------------------------------------------|---------------|---------------------------------------------------------------------------------------------------------------------------|
| 50  | PostDOCK     | 2559                                  | 3.7173 | A tool that distinguishes true binding ligand-protein complexes from docking artifacts                             | Subscription  | <a href="https://doi.org/10.1021/jm0493360">https://doi.org/10.1021/jm0493360</a>                                         |
| 51  | MolDock      | 2553                                  | 3.7163 | Combining a differential evolution within a cavity prediction algorithm                                            | Subscription  | <a href="https://doi.org/10.1021/jm051197e">https://doi.org/10.1021/jm051197e</a>                                         |
| 52  | MEDock       | 2510                                  | 3.7089 | A worldwide search strategy that exploits the highest entropy attribute of the Gaussian probability distribution   | Free          | <a href="https://medock.ee.ncku.edu.tw/">https://medock.ee.ncku.edu.tw/</a>                                               |
| 53  | SwarmDock    | 2449                                  | 3.6982 | A flexible protein-protein docking method                                                                          | Free          | <a href="https://bmm.crick.ac.uk/~svc-bmm-swarmdock/submit.cgi">https://bmm.crick.ac.uk/~svc-bmm-swarmdock/submit.cgi</a> |
| 54  | GAsDock      | 2373                                  | 3.6846 | A rapid, accurate, and flexible docking program                                                                    | Subscription  | <a href="https://doi.org/10.1016/j.bmcl.2004.06.091">doi:10.1016/j.bmcl.2004.06.091</a>                                   |
| 55  | SDOCKER      | 2331                                  | 3.6768 | A method utilizing available x-ray structures to improve docking accuracy                                          | Free          | <a href="https://github.com/xogeny/sdocker">https://github.com/xogeny/sdocker</a>                                         |
| 56  | SOFTDOCK     | 2279                                  | 3.6670 | A model continuity across development lifecycle                                                                    | Subscription  | <a href="https://doi.org/10.1109/DEXA.1999.795265">DOI: 10.1109/DEXA.1999.795265</a>                                      |
| 57  | DOCK Blaster | 2265                                  | 3.6643 | A free web-based service for molecular docking and virtual screening                                               | Subscription  | <a href="http://blaster.docking.org">http://blaster.docking.org</a>                                                       |
| 58  | M-ZDOCK      | 2257                                  | 3.6628 | A symmetric multimer docking                                                                                       | Subscription  | <a href="http://zdock.umassmed.edu/m-zdock/">http://zdock.umassmed.edu/m-zdock/</a>                                       |
| 59  | GAPDOCK      | 2249                                  | 3.6612 | A molecular docking methodology explores the behaviour of small molecules in the binding site of a target protein  | Subscription  | <a href="https://doi.org/10.1002/prot.10386">https://doi.org/10.1002/prot.10386</a>                                       |
| 60  | 3D-QSAR      | 2232                                  | 3.6580 | Simple and advanced tools for developing QSAR models                                                               | Free          | <a href="https://www.3d-qsar.com/">https://www.3d-qsar.com/</a>                                                           |
| 61  | INVDOCK      | 2221                                  | 3.6558 | A computer-automated identification of potential protein and nucleic acid (RNA or DNA) targets of a small molecule | Subscription  | <a href="http://bidd.nus.edu.sg/group/software/invdock.htm">http://bidd.nus.edu.sg/group/software/invdock.htm</a>         |

| No. | Software        | No. of citations to published studies | Score  | Features                                                                                                                                                                                                                                     | Accessibility | Website                                                                                                                                                                                                                                  |
|-----|-----------------|---------------------------------------|--------|----------------------------------------------------------------------------------------------------------------------------------------------------------------------------------------------------------------------------------------------|---------------|------------------------------------------------------------------------------------------------------------------------------------------------------------------------------------------------------------------------------------------|
| 62  | MOE             | 2216                                  | 3.6548 | An integrated computer-aided molecular design platform                                                                                                                                                                                       | Subscription  | <a href="https://www.chemcomp.com/Products.htm">https://www.chemcomp.com/Products.htm</a>                                                                                                                                                |
| 63  | rDock rDock 3.0 | 2191                                  | 3.6499 | A docking tool for small molecules against proteins and nucleic acids                                                                                                                                                                        | Free          | <a href="http://rdock.sourceforge.net/">http://rdock.sourceforge.net/</a>                                                                                                                                                                |
| 64  | DOCKoalent      | 2010                                  | 3.6125 | Screens large virtual libraries of electrophilic small molecules                                                                                                                                                                             | Free          | <a href="http://covalent.docking.org/">http://covalent.docking.org/</a>                                                                                                                                                                  |
| 65  | TarFisDock      | 1930                                  | 3.5948 | A web server that docks small molecules with protein structures in the Potential Drug Target Database (PDTD) in an effort to discover new drug targets                                                                                       | Subscription  | <a href="https://bio.tools/tarfisdock#!">https://bio.tools/tarfisdock#!</a>                                                                                                                                                              |
| 66  | SDOCK           | 1927                                  | 3.5941 | Improves the efficiency and robustness of particle swarm optimization (PSO) for solving flexible protein-ligand docking problems                                                                                                             | Subscription  | <a href="https://onlinelibrary.wiley.com/doi/abs/10.1002/jcc.21839">https://onlinelibrary.wiley.com/doi/abs/10.1002/jcc.21839</a><br><a href="http://mdl.ipc.pku.edu.cn/cgi-bin/down.cgi">http://mdl.ipc.pku.edu.cn/cgi-bin/down.cgi</a> |
| 67  | FINDSITE-LHM    | 1926                                  | 3.5939 | A homology modelling approach to flexible ligand docking that uses a collection of common molecule substructures derived from evolutionarily related templates as the reference compounds in similarity-based ligand binding pose prediction | Free          | <a href="http://www.mybiosoftware.com/findsite-lhm-1-0-homology-modeling-approach-flexible-ligand-docking.html">http://www.mybiosoftware.com/findsite-lhm-1-0-homology-modeling-approach-flexible-ligand-docking.html</a>                |
| 68  | DAIM-SEED-FFLD  | 1894                                  | 3.5866 | DAIM (Decomposition and Identification of Molecules), SEED (Solvation Energy for Exhaustive Docking), and FFLD (Fragment-based Flexible Ligand Docking)                                                                                      | Free          | <a href="http://www.biochem-caflisch.uzh.ch/movies/0003">http://www.biochem-caflisch.uzh.ch/movies/0003</a>                                                                                                                              |
| 69  | FlexPepDock     | 1891                                  | 3.5859 | Able to refine a coarse starting structure of a peptide-protein complex to a near-native model of the interaction                                                                                                                            | Free          | <a href="http://flexpepdock.furmanlab.cs.huji.ac.il/">http://flexpepdock.furmanlab.cs.huji.ac.il/</a>                                                                                                                                    |
| 70  | VoteDock        | 1860                                  | 3.5788 | Provides fast and accurate prediction method for 3D structure of a protein-ligand complex                                                                                                                                                    | Subscription  | <a href="https://connects.catalyst.harvard.edu/Profiles/display/1104658">https://connects.catalyst.harvard.edu/Profiles/display/1104658</a>                                                                                              |
| 71  | CDocker         | 1846                                  | 3.5755 | Molecular dynamics (MD) simulated-annealing-based algorithm.                                                                                                                                                                                 | Free          | <a href="https://doi.org/10.1002/jcc.10306">https://doi.org/10.1002/jcc.10306</a>                                                                                                                                                        |

| No. | Software                                                                                                      | No. of citations to published studies | Score  | Features                                                                                                                                                                                                | Accessibility | Website                                                                                                                                                             |
|-----|---------------------------------------------------------------------------------------------------------------|---------------------------------------|--------|---------------------------------------------------------------------------------------------------------------------------------------------------------------------------------------------------------|---------------|---------------------------------------------------------------------------------------------------------------------------------------------------------------------|
| 72  | POSIT                                                                                                         | 1792                                  | 3.5626 | A new approach to structure-based drug design (POSIT) rigorously built on the simple concept that pose prediction is intimately coupled to the quality and availability of experimental structural data | Free          | <a href="https://docs.eyesopen.com/applications/oedocking/posit/posit_overview.html">https://docs.eyesopen.com/applications/oedocking/posit/posit_overview.html</a> |
| 73  | DynaDock                                                                                                      | 1709                                  | 3.5420 | Used for docking peptides into flexible receptors                                                                                                                                                       | Free          | <a href="https://doi.org/10.1002/prot.22629">https://doi.org/10.1002/prot.22629</a>                                                                                 |
| 74  | PepCrawler                                                                                                    | 1700                                  | 3.5397 | A fast RRT-based algorithm for high-resolution refinement and binding-affinity estimation of peptide inhibitors                                                                                         | Free          | <a href="http://bioinfo3d.cs.tau.ac.il/PepCrawler/php.php">http://bioinfo3d.cs.tau.ac.il/PepCrawler/php.php</a>                                                     |
| 75  | GEMDOCK<br>GemDock 1.0<br>GemDock 2.0<br>GemDock 2.1<br>GemDock cent OS5<br>GemDock linux 9<br>GemDock-windos | 1666                                  | 3.5309 | Uses a Generic Evolutionary Method for molecular docking (GEMDOCK) and an empirical scoring function                                                                                                    | Free          | <a href="http://gemdock.life.nctu.edu.tw/dock/">http://gemdock.life.nctu.edu.tw/dock/</a>                                                                           |
| 76  | FireDock                                                                                                      | 1654                                  | 3.5278 | An efficient method for refinement and re-scoring of rigid-body protein-protein docking solutions                                                                                                       | Free          | <a href="http://bioinfo3d.cs.tau.ac.il/FireDock/">http://bioinfo3d.cs.tau.ac.il/FireDock/</a>                                                                       |
| 77  | CovalentDock                                                                                                  | 1648                                  | 3.5262 | Used for covalent bonds                                                                                                                                                                                 | Subscription  | <a href="https://doi.org/10.1002/jcc.23136">https://doi.org/10.1002/jcc.23136</a>                                                                                   |
| 78  | pyDock                                                                                                        | 1644                                  | 3.5252 | A program which was implemented in order to check the scoring of rigid-body docking poses                                                                                                               | Subscription  | <a href="https://life.bsc.es/pid/pydock/get_pydock.html">https://life.bsc.es/pid/pydock/get_pydock.html</a>                                                         |
| 79  | DOCKGROUND                                                                                                    | 1629                                  | 3.5212 | Implements a comprehensive database of co-crystallized (bound-bound) protein-protein complexes                                                                                                          | Free          | <a href="http://dockground.bioinformatics.ku.edu/">http://dockground.bioinformatics.ku.edu/</a>                                                                     |
| 80  | SODOCK                                                                                                        | 1564                                  | 3.5035 | Based on particle swarm optimization (PSO) for solving flexible protein-ligand docking problems                                                                                                         | Free          | <a href="http://www.mybiosoftware.com/tag/sodock">http://www.mybiosoftware.com/tag/sodock</a>                                                                       |
| 81  | SwissDock                                                                                                     | 1476                                  | 3.4783 | A web-server program dedicated to the docking of small molecules on target proteins                                                                                                                     | Free          | <a href="http://www.swissdock.ch/docking">http://www.swissdock.ch/docking</a>                                                                                       |



| No. | Software      | No. of citations to published studies | Score  | Features                                                                                                                                | Accessibility | Website                                                                                                                                         |
|-----|---------------|---------------------------------------|--------|-----------------------------------------------------------------------------------------------------------------------------------------|---------------|-------------------------------------------------------------------------------------------------------------------------------------------------|
| 82  | MedusaDock    | 1471                                  | 3.4769 | Models ligand and receptor flexibility simultaneously with sets of discrete rotamers                                                    | Free          | <a href="https://dokhlab.med.psu.edu/medusadock/#/NewTask">https://dokhlab.med.psu.edu/medusadock/#/NewTask</a>                                 |
| 83  | FiberDock     | 1427                                  | 3.4637 | An efficient method for flexible refinement and re-scoring of rigid-body protein-protein docking solutions                              | Free          | <a href="http://bioinfo3d.cs.tau.ac.il/FiberDock">http://bioinfo3d.cs.tau.ac.il/FiberDock</a>                                                   |
| 84  | VSDMIP        | 1426                                  | 3.4634 | Virtual screening data management on an integrated platform                                                                             | Free          | <a href="https://ub.cbm.uam.es/software/vsdmip/">https://ub.cbm.uam.es/software/vsdmip/</a>                                                     |
| 85  | GalaxySite    | 1426                                  | 3.4634 | An installation of the Galaxy software combined with many common tools and data                                                         | Free          | <a href="http://galaxy.seoklab.org/site">http://galaxy.seoklab.org/site</a>                                                                     |
| 86  | FlexX-Scan    | 1365                                  | 3.4444 | Developed to enhance the speed of the virtual screening process                                                                         | Subscription  | <a href="https://pubmed.ncbi.nlm.nih.gov/15382244/">https://pubmed.ncbi.nlm.nih.gov/15382244/</a>                                               |
| 87  | Kinome Render | 1346                                  | 3.4383 | Produces customized annotations on the human kinome tree                                                                                | Free          | <a href="http://biophys.umontreal.ca/nrg/resources.html">http://biophys.umontreal.ca/nrg/resources.html</a>                                     |
| 88  | Fleksy        | 1333                                  | 3.4341 | An approach to consider both ligand and receptor flexibility in small molecule docking                                                  | Subscription  | <a href="https://doi.org/10.1021/jm070593p">https://doi.org/10.1021/jm070593p</a>                                                               |
| 89  | KinDock       | 1319                                  | 3.4295 | A web server for the analysis of ATP-binding sites of protein kinases                                                                   | Obsolete      | <a href="http://abcis.cbs.cnrs.fr/kindock/">http://abcis.cbs.cnrs.fr/kindock/</a>                                                               |
| 90  | PharmDock     | 1306                                  | 3.4252 | A pharmacophore-based docking program that combines pose sampling and ranking based on optimized protein-based pharmacophore models     | Free          | <a href="https://www.ncbi.nlm.nih.gov/pmc/articles/PMC4012150/">https://www.ncbi.nlm.nih.gov/pmc/articles/PMC4012150/</a>                       |
| 91  | GriDock       | 1284                                  | 3.4178 | Designed to perform the molecular dockings of a large number of ligands stored in a single database (in a format supported by VEGA)     | Free          | <a href="https://www.ddl.unimi.it/cms/index.php?Software_projects:GriDock">https://www.ddl.unimi.it/cms/index.php?Software_projects:GriDock</a> |
| 92  | ParaDockS     | 1282                                  | 3.4171 | Designed to hold different optimization algorithms and objective functions and provides an accurate prediction of protein–DNA complexes | Subscription  | <a href="https://doi.org/10.1021/ci900467x">https://doi.org/10.1021/ci900467x</a>                                                               |

| No. | Software   | No. of citations to published studies | Score  | Features                                                                                                                                                           | Accessibility | Website                                                                                                                                                     |
|-----|------------|---------------------------------------|--------|--------------------------------------------------------------------------------------------------------------------------------------------------------------------|---------------|-------------------------------------------------------------------------------------------------------------------------------------------------------------|
| 93  | EpiDOCK    | 1270                                  | 3.4131 | The first structure-based server that predicts binding to the 23 most frequent MHC class II binding proteins                                                       | Free          | <a href="http://www.ddg-pharmfac.net/epidock/">http://www.ddg-pharmfac.net/epidock/</a>                                                                     |
| 94  | MacDOCK    | 1248                                  | 3.4055 | Able to generate orientations consistent with the known covalent binding mode of these complexes                                                                   | Subscription  | DOI: 10.1007/s10822-004-5291-4                                                                                                                              |
| 95  | FIPSDock   | 1239                                  | 3.4023 | Implements a variant of the Fully Informed Particle Swarm (FIPS) optimization method                                                                               | Subscription  | <a href="http://hub.hku.hk/handle/10722/189104">http://hub.hku.hk/handle/10722/189104</a>                                                                   |
| 96  | Flexidock  | 1239                                  | 3.4023 | Brings the convenience of a HDD docking station, with the performance of a HDD mobile rack                                                                         | Subscription  | <a href="http://scholar.dkyobobook.co.kr/searchDetail.laf?barcode=4010024416172">http://scholar.dkyobobook.co.kr/searchDetail.laf?barcode=4010024416172</a> |
| 97  | Smina      | 1230                                  | 3.3992 | A general methodology for designing an empirical scoring function                                                                                                  | Free          | <a href="https://pypi.org/project/docking-py/">https://pypi.org/project/docking-py/</a>                                                                     |
| 98  | BetaDock   | 1228                                  | 3.3985 | A molecular docking simulation software based on the theory of Beta-complex                                                                                        | Free          | DOI: 10.1080/07391102.2011.10507384                                                                                                                         |
| 99  | FLOG       | 1215                                  | 3.3938 | Flexible Ligands Oriented on Grid that searches a database of 3D coordinates to explore molecules complementary to a macromolecular receptor of known 3D structure | Subscription  | <a href="https://doi.org/10.1007/BF00119865">https://doi.org/10.1007/BF00119865</a>                                                                         |
| 100 | Combibuild | 1206                                  | 3.3906 | Builds combinatorial libraries for CRISPR screening                                                                                                                | Subscription  | <a href="https://doi.org/10.1021/jm010338j">https://doi.org/10.1021/jm010338j</a>                                                                           |
| 101 | MoDock     | 1174                                  | 3.3789 | A main method of structure-based virtual screening                                                                                                                 | Subscription  | <a href="https://doi.org/10.1186/s13015-015-0034-8">https://doi.org/10.1186/s13015-015-0034-8</a>                                                           |
| 102 | CRDOCK     | 1173                                  | 3.3786 | Contains a search engine, several energy minimization algorithms, and different scorings                                                                           | Free          | DOI: 10.1021/ci300194a                                                                                                                                      |
| 103 | FRDOCK     | 1154                                  | 3.3715 | Fast rotational docking based on FRM (Fast Rotational Method) to perform protein-protein docking                                                                   | Free          | <a href="http://frodock.chaconlab.org/">http://frodock.chaconlab.org/</a>                                                                                   |

| No. | Software                                                                  | No. of citations to published studies | Score  | Features                                                                                                                 | Accessibility       | Website                                                                                                                                       |
|-----|---------------------------------------------------------------------------|---------------------------------------|--------|--------------------------------------------------------------------------------------------------------------------------|---------------------|-----------------------------------------------------------------------------------------------------------------------------------------------|
| 104 | GalaxyDock<br>GalaxyDock1<br>GalaxyDock2<br>GalaxyDock3<br>GalaxyDock BP2 | 1154                                  | 3.3715 | Allows flexibility of pre-selected side-chains of ligand using Conformational Space Annealing                            | Free                | <a href="http://galaxy.seoklab.org/software/galaxydock.html">http://galaxy.seoklab.org/software/galaxydock.html</a>                           |
| 105 | SANDOCK                                                                   | 1153                                  | 3.3711 | Uses point complementary method that is based on shape and chemical complementarity between interacting molecules        | Subscription        | DOI: 10.1006/jmbi.1997.1608                                                                                                                   |
| 106 | VSDocker                                                                  | 1143                                  | 3.3673 | Allows using autodock4 for optimized virtual ligand screening on computer clusters                                       | Subscription        | <a href="https://www.hsls.pitt.edu/obrc/index.php?page=URL1275058861">https://www.hsls.pitt.edu/obrc/index.php?page=URL1275058861</a>         |
| 107 | EUDOC                                                                     | 1114                                  | 3.3561 | A computer program for identification of drug interaction sites in macromolecules and drug leads from chemical databases | Subscription        | <a href="https://doi.org/10.1002/jcc.1129">https://doi.org/10.1002/jcc.1129</a>                                                               |
| 108 | PyRX PyRX 0.5 PyRX 0.7 PyRX 0.8 PyRX 0.9.6 PyRX 0.9.8                     | 1085                                  | 3.3447 | A tool for Rational Drug Design                                                                                          | Free & Subscription | <a href="https://pyrx.sourceforge.io/">https://pyrx.sourceforge.io/</a>                                                                       |
| 109 | CombDock                                                                  | 1078                                  | 3.3419 | A combinatorial docking algorithm for the structural units-assembly problem                                              | Subscription        | <a href="http://bioinfo3d.cs.tau.ac.il/wk/index.php/Servers_%26_Software">http://bioinfo3d.cs.tau.ac.il/wk/index.php/Servers_%26_Software</a> |
| 110 | FastDock                                                                  | 1044                                  | 3.3280 | Lamarckian genetic algorithm to estimate the binding affinities between the structures                                   | Free                | <a href="https://pypi.org/project/fastdock/">https://pypi.org/project/fastdock/</a>                                                           |
| 111 | Lead finder<br>Leadfinder 2.3<br>Leadfinder 3.8                           | 1029                                  | 3.3217 | Provides a fast rate of calculations with unique scoring function that provides unsurpassed accuracy of calculations     | Subscription        | <a href="https://www.cresset-group.com/software/lead-finder/">https://www.cresset-group.com/software/lead-finder/</a>                         |
| 112 | pyDockTET                                                                 | 1009                                  | 3.3131 | A tethered-docking program which uses rigid-body docking system to generate domain-domain poses                          | Subscription        | DOI: 10.1186/1471-2105-9-441                                                                                                                  |
| 113 | MADAMM                                                                    | 1008                                  | 3.3127 | Utilizes rotamer libraries to produce several combinations of conformers                                                 | Subscription        | <a href="https://doi.org/10.1002/prot.22146">https://doi.org/10.1002/prot.22146</a>                                                           |
| 114 | pyDockRST                                                                 | 1003                                  | 3.3106 | Uses the percentage of satisfied restrains                                                                               | Subscription        | DOI: 10.1016/j.jmb.2006.01.001                                                                                                                |

| No. | Software      | No. of citations to published studies | Score  | Features                                                                                                                                                         | Accessibility | Website                                                                                                             |
|-----|---------------|---------------------------------------|--------|------------------------------------------------------------------------------------------------------------------------------------------------------------------|---------------|---------------------------------------------------------------------------------------------------------------------|
| 115 | DOCKTITE      | 995                                   | 3.3071 | Utilized for covalent docking in the Molecular Operating Environment (MOE)                                                                                       | Subscription  | <a href="https://pubs.acs.org/doi/10.1021/ci500681r">https://pubs.acs.org/doi/10.1021/ci500681r</a>                 |
| 116 | pyDockCG      | 992                                   | 3.3058 | A coarse-grained potential for protein-protein docking scoring and refinement, based on the known UNRES model for polypeptide chains                             | Subscription  | <a href="https://doi.org/10.1021/jp112292b">https://doi.org/10.1021/jp112292b</a>                                   |
| 117 | ASEDock       | 990                                   | 3.3049 | Based on a shape similarity assessment between a concave portion and the ligand                                                                                  | Subscription  | <a href="https://doi.org/10.1021/ci700352q">https://doi.org/10.1021/ci700352q</a>                                   |
| 118 | IsoMIF        | 975                                   | 3.2983 | Allows to identify binding site molecular interaction field (MIF) similarities between pairs of structures                                                       | Free          | <a href="http://biophys.umontreal.ca/nrg/resources.html">http://biophys.umontreal.ca/nrg/resources.html</a>         |
| 119 | LigDockCSA    | 975                                   | 3.2983 | Combines a highly efficient search method with a scoring function based on the autodock energy function with a piecewise linear potential (PLP) torsional energy | Subscription  | <a href="https://doi.org/10.1002/jcc.21905">https://doi.org/10.1002/jcc.21905</a>                                   |
| 120 | GalaxyPepDock | 946                                   | 3.2851 | A web server for protein structure prediction, refinement, and related methods Protein-peptide docking based on interaction similarity                           | Free          | <a href="http://galaxy.seoklab.org/pepdock">http://galaxy.seoklab.org/pepdock</a>                                   |
| 121 | pyDockWEB     | 924                                   | 3.2749 | A web server for the rigid- body docking forecast of protein-protein complex structures using an updated version of the pydock scoring algorithm                 | Free          | <a href="https://life.bsc.es/pid/pydockweb">https://life.bsc.es/pid/pydockweb</a>                                   |
| 122 | AnchorDock    | 912                                   | 3.2693 | Automatically identifying anchoring spots on the protein surface                                                                                                 | Subscription  | <a href="https://doi.org/10.1016/j.str.2015.03.010">https://doi.org/10.1016/j.str.2015.03.010</a>                   |
| 123 | ArgusLab      | 883                                   | 3.2552 | A molecular modelling graphics and drug design program for Windows OS                                                                                            | Free          | <a href="http://www.arguslab.com/arguslab.com/ArgusLab.html">http://www.arguslab.com/arguslab.com/ArgusLab.html</a> |
| 124 | idock         | 882                                   | 3.2547 | A multithreaded virtual screening tool for flexible ligand docking for computational drug discovery                                                              | Subscription  | <a href="https://GitHub.com/HongjianLi/idock">https://GitHub.com/HongjianLi/idock</a>                               |
| 125 | HybridDock    | 854                                   | 3.2407 | Significantly improves the performance in both binding affinity and binding mode predictions, compared to the sole mdock program                                 | Subscription  | <a href="https://doi.org/10.1021/acs.jcim.5b00275">https://doi.org/10.1021/acs.jcim.5b00275</a>                     |

| No. | Software      | No. of citations to published studies | Score  | Features                                                                                                                           | Accessibility | Website                                                                                                                                                                                       |
|-----|---------------|---------------------------------------|--------|------------------------------------------------------------------------------------------------------------------------------------|---------------|-----------------------------------------------------------------------------------------------------------------------------------------------------------------------------------------------|
| 126 | ParaDock      | 840                                   | 3.2335 | Rigid protein flexible DNA Docking                                                                                                 | Free          | <a href="http://bioinfo3d.cs.tau.ac.il/ParaDock/php.php">http://bioinfo3d.cs.tau.ac.il/ParaDock/php.php</a>                                                                                   |
| 127 | WinDock       | 810                                   | 3.2177 | Designed to help researchers perform structure-based drug discovery tasks                                                          | Subscription  | <a href="https://doi.org/10.1002/jcc.20756">https://doi.org/10.1002/jcc.20756</a>                                                                                                             |
| 128 | OptiDock      | 787                                   | 3.2052 | Involves choosing a representative subset of compounds                                                                             | Subscription  | <a href="https://doi.org/10.1021/cc034068x">https://doi.org/10.1021/cc034068x</a>                                                                                                             |
| 129 | BiGGER        | 765                                   | 3.1929 | Predicts the mode of binding between two proteins                                                                                  | Free          | <a href="https://doi.org/10.1002/(SICI)1097-0134(20000601)39:4&lt;372::AID-PROT100&gt;3.0.CO;2-Q">https://doi.org/10.1002/(SICI)1097-0134(20000601)39:4&lt;372::AID-PROT100&gt;3.0.CO;2-Q</a> |
| 130 | MTiOpenScreen | 759                                   | 3.1895 | Automated ligand docking into entire protein surface for up to 10 ligands allowing to detect druggable cavities using autodock 4.2 | Free          | <a href="http://bioserv.rpbs.univ-paris-diderot.fr/services/MTiOpenScreen/">http://bioserv.rpbs.univ-paris-diderot.fr/services/MTiOpenScreen/</a>                                             |
| 131 | HomDock       | 752                                   | 3.1855 | Improves docking accuracy and efficiency                                                                                           | Subscription  | <a href="http://www.chil2.de/HomDock.html">http://www.chil2.de/HomDock.html</a>                                                                                                               |
| 132 | BDOCK         | 745                                   | 3.1814 | An enzyme-inhibitor docking algorithm based on the degree of burial and conservation of surface residues                           | Free          | <a href="http://www.biotec.tu-dresden.de/~approximatively_bhuang/bdock">www.biotec.tu-dresden.de /approximatively bhuang/bdock</a>                                                            |
| 133 | LiGendock     | 730                                   | 3.1726 | Based on pharmacophore models of binding sites, including a non-enumerative docking calculation                                    | Subscription  | <a href="https://doi.org/10.1021/ci400079k">https://doi.org/10.1021/ci400079k</a>                                                                                                             |
| 134 | DockBench     | 726                                   | 3.1702 | Handles seven docking software packages and offers the possibility to test up to seventeen different protocols                     | Free          | <a href="https://doi.org/10.3390/molecules20069977">doi: 10.3390/molecules20069977</a>                                                                                                        |
| 135 | AUDocker LE   | 673                                   | 3.1373 | Designed to develop a software tool as a front-end graphical interface                                                             | Free          | <a href="https://doi.org/10.1186/1756-0500-4-445">DOI: 10.1186/1756-0500-4-445</a>                                                                                                            |
| 136 | 3dRPC         | 667                                   | 3.1334 | Developed as an automated method for predicting 3D structures of RNA-protein                                                       | Free          | <a href="http://biophy.hust.edu.cn/3dRPC.html">http://biophy.hust.edu.cn/3dRPC.html</a>                                                                                                       |

| No. | Software                  | No. of citations to published studies | Score  | Features                                                                                     | Accessibility | Website                                                                                                                                                 |
|-----|---------------------------|---------------------------------------|--------|----------------------------------------------------------------------------------------------|---------------|---------------------------------------------------------------------------------------------------------------------------------------------------------|
| 137 | DarwinDock                | 665                                   | 3.1321 | Isolates posing and scoring into separate stages to allow complete binding site sampling     | Subscription  | <a href="https://resolver.caltech.edu/CaltechTHESIS:06122017-230026717">https://resolver.caltech.edu/CaltechTHESIS:06122017-230026717</a>               |
| 138 | VLifeMDS                  | 648                                   | 3.1208 | An integrated platform for Computer Aided Drug Design (CADD) and molecular discovery         | Subscription  | <a href="https://www.vlifesciences.com/products/VLifeMDS/Product_VLifeMDS.php">https://www.vlifesciences.com/products/VLifeMDS/Product_VLifeMDS.php</a> |
| 139 | pDOCK                     | 630                                   | 3.1086 | An experimental pygtk docking implementation                                                 | Free          | <a href="https://pypi.org/project/pdock/">https://pypi.org/project/pdock/</a>                                                                           |
| 140 | CovalentDock Cloud        | 621                                   | 3.1023 | Provides a simple user-friendly web interface to perform covalent docking                    | Free          | <a href="http://docking.sce.ntu.edu.sg/">http://docking.sce.ntu.edu.sg/</a>                                                                             |
| 141 | SLIM (BSP-SLIM)<br>SLIM21 | 613                                   | 3.0967 | A blind molecular docking method on low-resolution protein structures                        | Free          | <a href="https://zhanglab.ccmb.med.umich.edu/BSP-SLIM/">https://zhanglab.ccmb.med.umich.edu/BSP-SLIM/</a>                                               |
| 142 | 3dRNAscore                | 590                                   | 3.0801 | Developed as an automated method for predicting 3D structures of noncoding RNAs              | Free          | <a href="http://biophy.hust.edu.cn/3dRNAscore.html">http://biophy.hust.edu.cn/3dRNAscore.html</a>                                                       |
| 143 | FlexAID                   | 588                                   | 3.0786 | Can use small-molecules and peptides as ligands while uses proteins/nucleic acids as targets | Free          | <a href="http://biophys.umontreal.ca/nrg/resources.html">http://biophys.umontreal.ca/nrg/resources.html</a>                                             |
| 144 | LeDock                    | 588                                   | 3.0786 | Can be used for docking of ligands with protein target                                       | Free          | <a href="http://www.lephar.com/download.htm">http://www.lephar.com/download.htm</a>                                                                     |
| 145 | MemDock                   | 585                                   | 3.0764 | Membrane protein docking algorithm                                                           | Free          | <a href="http://bioinfo3d.cs.tau.ac.il/Memdock/php.php">http://bioinfo3d.cs.tau.ac.il/Memdock/php.php</a>                                               |
| 146 | TagDock                   | 584                                   | 3.0757 | Generates 3D models of oligomeric biomolecular complexes                                     | Subscription  | <a href="https://doi.org/10.1021/bi400158k">https://doi.org/10.1021/bi400158k</a>                                                                       |
| 147 | MDockPeP                  | 580                                   | 3.0727 | Docks the all-atom, flexible peptide onto the whole protein                                  | Free          | <a href="http://zougrouptoolkit.missouri.edu/mdockpep/">http://zougrouptoolkit.missouri.edu/mdockpep/</a>                                               |
| 148 | ASPDock                   | 578                                   | 3.0712 | Atomic Solvation Parameters (ASP) model which is used for calculating the                    | Subscription  | <a href="http://biophy.hust.edu.cn/ASPDock.html">http://biophy.hust.edu.cn/ASPDock.html</a>                                                             |

| No. | Software               | No. of citations to published studies | Score  | Features                                                                                                                                       | Accessibility | Website                                                                                                                 |
|-----|------------------------|---------------------------------------|--------|------------------------------------------------------------------------------------------------------------------------------------------------|---------------|-------------------------------------------------------------------------------------------------------------------------|
|     |                        |                                       |        | binding free energy of protein complexes                                                                                                       |               |                                                                                                                         |
| 149 | PythDock               | 566                                   | 3.0621 | Uses Python programming language with a simple scoring function and a population-based search engine                                           | Subscription  | <a href="https://doi.org/10.1007/s12272-011-0906-5">https://doi.org/10.1007/s12272-011-0906-5</a>                       |
| 150 | HDOCK                  | 541                                   | 3.0425 | Predicts the binding complexes between two molecules like proteins and nucleic acids by using a hybrid docking strategy                        | Free          | <a href="http://hdock.phys.hust.edu.cn/">http://hdock.phys.hust.edu.cn/</a>                                             |
| 151 | iGEMDOCK               | 536                                   | 3.0384 | Can enrich the hit rate and provide biological insights by deriving the pharmacological interactions from screening compounds                  | Free          | <a href="http://gemdock.life.nctu.edu.tw/dock/igemdock.php">http://gemdock.life.nctu.edu.tw/dock/igemdock.php</a>       |
| 152 | DockRank               | 528                                   | 3.0319 | Improves the scoring of docked poses, outperforms several energy-based scoring functions, and prioritizing ligands according to their affinity | Subscription  | <a href="https://pubmed.ncbi.nlm.nih.gov/23873600/">https://pubmed.ncbi.nlm.nih.gov/23873600/</a>                       |
| 153 | ROSIE (Rosetta Online) | 524                                   | 3.0286 | Provides the 3D structure prediction and high-resolution design of natural and non-natural polymers                                            | Free          | <a href="https://rosie.rosettacommons.org/">https://rosie.rosettacommons.org/</a>                                       |
| 154 | ISE-Dock               | 492                                   | 3.0012 | Eliminates values that consistently lead to the worst results, thus optimizing the search for docking poses                                    | Subscription  | <a href="https://pubmed.ncbi.nlm.nih.gov/18058908/">https://pubmed.ncbi.nlm.nih.gov/18058908/</a>                       |
| 155 | NRGsuite               | 490                                   | 2.9995 | Gives access to powerful docking simulations that can be used in structure-guided drug design as well as an educational tool                   | Free          | <a href="http://biophys.umontreal.ca/nrg/resources.html">http://biophys.umontreal.ca/nrg/resources.html</a>             |
| 156 | evERdock               | 488                                   | 2.9977 | Calculates binding free energy relaying on molecular dynamics (MD) simulations                                                                 | Subscription  | <a href="https://doi.org/10.1063/1.5019864">https://doi.org/10.1063/1.5019864</a>                                       |
| 157 | LeWater                | 474                                   | 2.9850 | Filter docking poses and/or integrated into a scoring function to improve the accuracy of predicted binding affinity                           | Free          | <a href="http://www.lephar.com/download.htm">http://www.lephar.com/download.htm</a>                                     |
| 158 | LibDock                | 472                                   | 2.9832 | Enable a safe and efficient loading and unloading while reducing downtime to a minimum                                                         | Free          | <a href="https://www.bioz.com/result/libdock/product/Accelrys">https://www.bioz.com/result/libdock/product/Accelrys</a> |

| No. | Software   | No. of citations to published studies | Score  | Features                                                                                                   | Accessibility | Website                                                                                                                                                         |
|-----|------------|---------------------------------------|--------|------------------------------------------------------------------------------------------------------------|---------------|-----------------------------------------------------------------------------------------------------------------------------------------------------------------|
| 159 | bhDock     | 463                                   | 2.9748 | Uses two-step algorithm. First, low-resolution binding sites. Second, molecular dynamics                   | Free          | DOI: 10.1002/jcc.21394                                                                                                                                          |
| 160 | PLANTS     | 462                                   | 2.9739 | PLANTS (Protein-Ligand ANT System), which is based on ant colony optimization                              | Subscription  | <a href="https://doi.org/10.1021/ci800298z">https://doi.org/10.1021/ci800298z</a>                                                                               |
| 161 | VLifeDock  | 460                                   | 2.9720 | Explores binding mode of ligand over a grid                                                                | Subscription  | <a href="https://www.vlifesciences.com/products/Functional_products/VLifeDock.php">https://www.vlifesciences.com/products/Functional_products/VLifeDock.php</a> |
| 162 | HiPCDock   | 432                                   | 2.9447 | High-performance computing-based molecular docking scheme which is termed hipcdock                         | Subscription  | <a href="https://pubmed.ncbi.nlm.nih.gov/19525200/">https://pubmed.ncbi.nlm.nih.gov/19525200/</a>                                                               |
| 163 | eSimDock   | 431                                   | 2.9437 | Employs non-linear machine learning-based scoring functions to improve the accuracy of ligand ranking      | Subscription  | <a href="https://pubmed.ncbi.nlm.nih.gov/24171431/">https://pubmed.ncbi.nlm.nih.gov/24171431/</a>                                                               |
| 164 | DockingApp | 400                                   | 2.9113 | Explores the behavior of small molecules in the binding site of a target protein                           | Free          | <a href="https://doi.org/10.1007/s10822-016-0006-1">https://doi.org/10.1007/s10822-016-0006-1</a>                                                               |
| 165 | DockDE     | 387                                   | 2.8970 | Showed remarkable performance in terms of convergence speed and robustness regarding the found solution    | Subscription  | <a href="https://link.springer.com/article/10.1023/A:1008202821328">https://link.springer.com/article/10.1023/A:1008202821328</a>                               |
| 166 | YUCCA      | 352                                   | 2.8558 | A new algorithm for rigid protein–small-molecule docking                                                   | Subscription  | <a href="https://doi.org/10.1002/cbdv.200590123">https://doi.org/10.1002/cbdv.200590123</a>                                                                     |
| 167 | RPDOCK     | 348                                   | 2.8508 | A docking procedure specific to RNA-protein complexes                                                      | Subscription  | <a href="https://www.nature.com/articles/srep01887">https://www.nature.com/articles/srep01887</a>                                                               |
| 168 | ADAM       | 348                                   | 2.8508 | Predicts a stable binding mode to target flexible ligand molecule macromolecule                            | Subscription  | <a href="http://adam.vbi.vt.edu">http://adam.vbi.vt.edu</a>                                                                                                     |
| 169 | QSAR-Co    | 346                                   | 2.8483 | Setup classification-based QSAR models that allow mining the response data coming from multiple conditions | Free          | <a href="https://sites.google.com/view/qsar-co">https://sites.google.com/view/qsar-co</a>                                                                       |
| 170 | SymmRef    | 315                                   | 2.8076 | Flexible backbone and side-chain refinement and re-scoring of symmetric rigid-body                         | Free          | <a href="http://bioinfo3d.cs.tau.ac.il/SymmRef/php.php">http://bioinfo3d.cs.tau.ac.il/SymmRef/php.php</a>                                                       |



| No. | Software     | No. of citations to published studies | Score  | Features                                                                                                                                                                                            | Accessibility | Website                                                                                                                                                                         |
|-----|--------------|---------------------------------------|--------|-----------------------------------------------------------------------------------------------------------------------------------------------------------------------------------------------------|---------------|---------------------------------------------------------------------------------------------------------------------------------------------------------------------------------|
| 171 | DockQ        | 310                                   | 2.8006 | A continuous protein-protein docking model quality measure                                                                                                                                          | Free          | <a href="http://github.com/bjornwallner/DockQ/">http://github.com/bjornwallner/DockQ/</a>                                                                                       |
| 172 | HSYMDOCK     | 280                                   | 2.7564 | Symmetric protein docking for oligomers with Cn or Dn symmetry from the structure or sequence of a subunit molecule                                                                                 | Free          | <a href="http://huanglab.phys.hust.edu.cn/hsymdock/">http://huanglab.phys.hust.edu.cn/hsymdock/</a>                                                                             |
| 173 | MEGADOCK     | 256                                   | 2.7175 | A structural bioinformatics software for FFT-grid-based protein-protein docking that takes advantage of CUDA architecture of NVIDIA graphics processing units (GPUs) and multiple computation nodes | Free          | <a href="http://www.bi.cs.titech.ac.jp/megadock">http://www.bi.cs.titech.ac.jp/megadock</a>                                                                                     |
| 174 | Molegro      | 242                                   | 2.6931 | Shown to outperform other docking programs with regard to identification of correct binding modes                                                                                                   | Free          | <a href="http://molexus.io/molegro-molecular-viewer/">http://molexus.io/molegro-molecular-viewer/</a>                                                                           |
| 175 | LightDock    | 240                                   | 2.6895 | Optimizes the generated docking poses towards those energetically more favourable at every simulation step                                                                                          | Free          | <a href="https://github.com/brianjimenez/lightdock">https://github.com/brianjimenez/lightdock</a>                                                                               |
| 176 | MEGADOCK-GPU | 232                                   | 2.6747 | A fast, improved, protein-protein docking prediction by introducing a simple hydrophobic interaction model                                                                                          | Free          | <a href="http://www.bi.cs.titech.ac.jp/megadock/gpu/">http://www.bi.cs.titech.ac.jp/megadock/gpu/</a>                                                                           |
| 177 | GetCleft     | 228                                   | 2.6672 | Built-in and gives the possibility to refine and measure the volume of cavities                                                                                                                     | Free          | <a href="http://biophys.umontreal.ca/nrg/resources.html">http://biophys.umontreal.ca/nrg/resources.html</a>                                                                     |
| 178 | Snapdock     | 224                                   | 2.6595 | Employs a Geometric Hashing-based structural alignment scheme to align the target proteins to the interfaces of non-redundant protein-protein interface libraries                                   | Subscription  | <a href="https://doi.org/10.1093/bioinformatics/btx233">https://doi.org/10.1093/bioinformatics/btx233</a>                                                                       |
| 179 | ProQDock     | 219                                   | 2.6497 | Uses support vector machines trained to predict the quality of protein docking models using features that can be calculated from the docking model itself                                           | Free          | <a href="http://bioinfo.ifm.liu.se/ProQDock">http://bioinfo.ifm.liu.se/ProQDock</a>                                                                                             |
| 180 | Ligin        | 193                                   | 2.5948 | Uses surface complementarity approach for predicting the structure of ligand-receptor complex                                                                                                       | Subscription  | <a href="https://doi.org/10.1002/(SICI)1097-0134(1997)1+&lt;210::AID-PROT28&gt;3.0.CO;2-Q">https://doi.org/10.1002/(SICI)1097-0134(1997)1+&lt;210::AID-PROT28&gt;3.0.CO;2-Q</a> |

| No. | Software                                                   | No. of citations to published studies | Score  | Features                                                                                                                                          | Accessibility | Website                                                                                                                                                                                     |
|-----|------------------------------------------------------------|---------------------------------------|--------|---------------------------------------------------------------------------------------------------------------------------------------------------|---------------|---------------------------------------------------------------------------------------------------------------------------------------------------------------------------------------------|
| 181 | 2dRNA                                                      | 182                                   | 2.5693 | Predicts RNA secondary structure                                                                                                                  | Free          | <a href="http://biophy.hust.edu.cn/2dRNA/download">http://biophy.hust.edu.cn/2dRNA/download</a>                                                                                             |
| 182 | DockTrina                                                  | 177                                   | 2.5572 | A protein docking technique for demonstrating the 3D structures of nonsymmetrical triangular trimers                                              | Free          | <a href="https://team.inria.fr/nano-d/software/docktrina/">https://team.inria.fr/nano-d/software/docktrina/</a>                                                                             |
| 183 | FITTED                                                     | 175                                   | 2.5523 | Can deal with both the flexibility of macromolecules (side chains and main chains) and the presence of bridging water molecules                   | Free          | <a href="http://mgltools.scripps.edu/documentation/links/fitted">http://mgltools.scripps.edu/documentation/links/fitted</a>                                                                 |
| 184 | DockThor                                                   | 158                                   | 2.5079 | Performs pose prediction on redocking studies                                                                                                     | Free          | <a href="https://www.dockthor.lncc.br/">https://www.dockthor.lncc.br/</a>                                                                                                                   |
| 185 | HYBRID                                                     | 156                                   | 2.5024 | The HYBRID program uses a modified version of FRED's algorithm that uses both ligand- and structure-based information to dock molecules           | Subscription  | <a href="https://www.eyesopen.com/oedocking-tk">https://www.eyesopen.com/oedocking-tk</a>                                                                                                   |
| 186 | PATIDOCK                                                   | 154                                   | 2.4968 | Relies solely on the 3D structure of the individual components and the experimentally derived Residual Dipolar Couplings (RDCs) for the complex   | Subscription  | <a href="https://doi.org/10.1021/ja100447p">https://doi.org/10.1021/ja100447p</a>                                                                                                           |
| 187 | TCRFlexDock                                                | 147                                   | 2.4766 | Produces relatively accurate docking models (average interface RMSDs less than 2 Å from bound)                                                    | Free          | <a href="http://www.cbs.dtu.dk/services/TCRpMHCmodels/index.php">http://www.cbs.dtu.dk/services/TCRpMHCmodels/index.php</a>                                                                 |
| 188 | mtsslDock<br>mtsslSuite<br>mtsslTrilaterate<br>mtsslWizard | 138                                   | 2.4491 | Enables the user to dock two macromolecules based on a set of experimental PELDOR distances                                                       | Subscription  | <a href="http://www.mtsslsuite.isb.ukbonn.de/">http://www.mtsslsuite.isb.ukbonn.de/</a>                                                                                                     |
| 189 | Schrödinger                                                | 133                                   | 2.4331 | Delivers actual creditable and high achievement computational dependent technology to solution in life science and other applied science research | Free          | <a href="https://www.schrodinger.com/freemaestro">https://www.schrodinger.com/freemaestro</a>                                                                                               |
| 190 | SnugDock                                                   | 95                                    | 2.2870 | Predicts antibody-antigen complexes through optimization of antibody degrees of freedom relevant to binding                                       | Subscription  | <a href="https://www.rosettacommons.org/docs/latest/application_documentation/antibody/snugdock">https://www.rosettacommons.org/docs/latest/application_documentation/antibody/snugdock</a> |
| 191 | ScoreDock                                                  | 82                                    | 2.2231 | Improves the docking accuracy and was shown to be reliable in docking quality assessment                                                          | Subscription  | DOI: 10.1023/a:1011188704521                                                                                                                                                                |

| No. | Software             | No. of citations to published studies | Score  | Features                                                                                                                                                           | Accessibility | Website                                                                                                       |
|-----|----------------------|---------------------------------------|--------|--------------------------------------------------------------------------------------------------------------------------------------------------------------------|---------------|---------------------------------------------------------------------------------------------------------------|
| 192 | DockAFM              | 70                                    | 2.1544 | Establishes a link between topographic images from AFM and molecular dynamics of single proteins                                                                   | Free          | <a href="http://biodev.cea.fr/dockafm/">http://biodev.cea.fr/dockafm/</a>                                     |
| 193 | hint!                | 61                                    | 2.0946 | An empirical molecular modelling system with new methods for de novo drug design and protein or nucleic acid structural analysis                                   | Subscription  | <a href="https://doi.org/10.1007/BF00135313">https://doi.org/10.1007/BF00135313</a>                           |
| 194 | S3DB                 | 44                                    | 1.9527 | A database of manually curated target and ligand structures                                                                                                        | Free          | <a href="http://www.swissdock.ch/">http://www.swissdock.ch/</a>                                               |
| 195 | SCIGRESS             | 41                                    | 1.9220 | Computational chemistry integrated platform SCIGRESS                                                                                                               | Subscription  | <a href="https://doi.org/10.11546/cicsj.26.122">https://doi.org/10.11546/cicsj.26.122</a>                     |
| 196 | LeFrag               | 39                                    | 1.9003 | Automatically decompose all small molecules in a library into fragments                                                                                            | Free          | <a href="http://www.lephar.com/download.htm">http://www.lephar.com/download.htm</a>                           |
| 197 | IMOLSDOCK            | 36                                    | 1.8656 | Uses mutually orthogonal Latin squares (MOLS) to sample the conformation and the docking pose of the ligand and also the flexible residues of the receptor protein | Subscription  | <a href="https://doi.org/10.1016/j.jmgm.2017.03.008">https://doi.org/10.1016/j.jmgm.2017.03.008</a>           |
| 198 | molecularforecaster  | 35                                    | 1.8533 | Used for drug discovery, metabolism prediction, combinatorial chemistry, and asymmetric catalyst design                                                            | Free          | <a href="https://www.molecularforecaster.com/">https://www.molecularforecaster.com/</a>                       |
| 199 | MpSDock<br>MpSDockZn | 35                                    | 1.8533 | A metalloprotein-specific docking program, which runs on a scheme similar to consensus scoring consisting                                                          | Subscription  | <a href="http://www.lilab-ecust.cn/home/resource/14.html">http://www.lilab-ecust.cn/home/resource/14.html</a> |
| 200 | Hammerhead           | 31                                    | 1.8006 | Fast, fully automated docking of flexible ligands to protein binding sites                                                                                         | Subscription  | <a href="https://doi.org/10.1016/s1074-5521(96)90093-9">doi:10.1016/s1074-5521(96)90093-9</a>                 |
| 201 | UDock                | 31                                    | 1.8006 | Interactive protein docking system, intended for both naive and experienced users                                                                                  | Free          | <a href="http://udock.fr">http://udock.fr</a>                                                                 |
| 202 | MEGADOCK-Web         | 29                                    | 1.7717 | A database of protein-protein interactions (ppis) predicted by an FFT-grid-based protein-protein docking software, MEGADOCK                                        | Free          | <a href="http://www.bi.cs.titech.ac.jp/megadock-web/">http://www.bi.cs.titech.ac.jp/megadock-web/</a>         |

| No. | Software               | No. of citations to published studies | Score  | Features                                                                                                                                                        | Accessibility | Website                                                                                                                                                                                                                                                                               |
|-----|------------------------|---------------------------------------|--------|-----------------------------------------------------------------------------------------------------------------------------------------------------------------|---------------|---------------------------------------------------------------------------------------------------------------------------------------------------------------------------------------------------------------------------------------------------------------------------------------|
| 203 | DockScore              | 18                                    | 1.5645 | Can be utilized to rank protein-protein docked poses                                                                                                            | Free          | <a href="http://caps.ncbs.res.in/dockscore/">http://caps.ncbs.res.in/dockscore/</a>                                                                                                                                                                                                   |
| 204 | DockAnalyse            | 18                                    | 1.5645 | Analysis of protein-protein interactions                                                                                                                        | Free          | <a href="http://bioinf.uab.es/rker/DockAnalyse/DockAnalyse.zip">http://bioinf.uab.es/rker/DockAnalyse/DockAnalyse.zip</a>                                                                                                                                                             |
| 205 | mApfDock               | 13                                    | 1.4232 | The docking of candidates to atomic property fields derived by co-crystallized ligands                                                                          | Subscription  | <a href="https://doi.org/10.4155/fmc.14.113">https://doi.org/10.4155/fmc.14.113</a>                                                                                                                                                                                                   |
| 206 | mPockDock              | 13                                    | 1.4232 | Reduces the rate of false-negatives in activity prediction by docking flexible 3D models of compounds include multi-conformational docking                      | Subscription  | <a href="https://doi.org/10.4155/fmc.14.113">https://doi.org/10.4155/fmc.14.113</a>                                                                                                                                                                                                   |
| 207 | FlexGAsDock            | 13                                    | 1.4232 | Based on the hierarchical docking strategy                                                                                                                      | Subscription  | <a href="http://en.cnki.com.cn/Article_en/CJFDTOTAL-DLLG200802024.htm">http://en.cnki.com.cn/Article_en/CJFDTOTAL-DLLG200802024.htm</a>                                                                                                                                               |
| 208 | ELMDOCK<br>ELMPATIDOCK | 12                                    | 1.3884 | Relies solely on the 3D structure of the individual components and the overall rotational diffusion tensor of the complex                                       | Subscription  | <a href="https://onlinelibrary.wiley.com/doi/abs/10.1002/prot.23053">https://onlinelibrary.wiley.com/doi/abs/10.1002/prot.23053</a>                                                                                                                                                   |
| 209 | BDT-AutoDock           | 3                                     | 0.7864 | Using receptor flexibility during docking using a large library of ligands onto one or more receptors without defining one a priori ligand-binding site on them | Free          | <a href="http://www.quimica.urv.cat/~pujadas/BDT/">http://www.quimica.urv.cat/~pujadas/BDT/</a>                                                                                                                                                                                       |
| 210 | Discovery Studio       | 0                                     | 0.0000 | An interactive package with a broad variety of features for modelling and simulation                                                                            | Subscription  | <a href="https://www.bu.edu/tech/support/research/software-and-programming/software-and-applications/rcs-software-packages/discovery-studio/">https://www.bu.edu/tech/support/research/software-and-programming/software-and-applications/rcs-software-packages/discovery-studio/</a> |
| 211 | 3dRNA-RFSP             | 0                                     | 0.0000 | Constructs a statistical potential for 3D RNA structure evaluation by using an iterative method that circumvents the reference state problem                    | Free          | <a href="http://biophy.hust.edu.cn/3dRNA-RFSP.html">http://biophy.hust.edu.cn/3dRNA-RFSP.html</a>                                                                                                                                                                                     |
